# Supplementary material for: The physical properties and unusual pyrolysis behaviour of a supramolecular complex of β-cyclodextrin and potassium ferrioxalate
Source: Royal Society of Chemistry journal article supplement (doi:10.1039/c2dt11794k), 2012-01-01

# Supporting Information

## Physical Property and Unusual Pyrolysis Behaviour of Supramolecular Complex of $\beta$ -Cyclodextrin and Potassium Ferrioxalate

Zheng Dang, Le-Xin Song\*, Jun Yang, Jie Chen, Yue Teng

*Department of Chemistry, University of Science and Technology of China, Hefei, 230026, China*

(Received: 21th September, 2011)

### A List of the Contents for All the Supporting Information

---

| Pages | Contents                                                                                                                                     |
|-------|----------------------------------------------------------------------------------------------------------------------------------------------|
| 1     | A Table of Contents.                                                                                                                         |
| 2     | Table 1. Appointed Heating Program for the Samples.                                                                                          |
| 3     | Figure 1. Mass spectrum of $K_3Fe(C_2O_4)_3$ - $\beta$ -CD at 42.67 min.                                                                     |
| 4     | Figure 2. XPS-( $K_{2p}$ ) and XPS-( $Fe_{2p}$ ) spectra of PF (a), the physical mixture of PF and $\beta$ -CD (b), and PF- $\beta$ -CD (c). |

---

**Table 1. Appointed Heating Program for the Samples**

| Step | Temperature range | Heating rate         | Retained time |
|------|-------------------|----------------------|---------------|
|      | /K                | /K·min <sup>-1</sup> | /min          |
| 1    | 303               | 0                    | 3             |
| 2    | 473               | 80                   | 5             |
| 3    | 673               | 10                   | 3             |
| 4    | 873               | 80                   | 10            |

**Figure 1. Mass spectrum of PF- $\beta$ -CD at 42.67 min.**

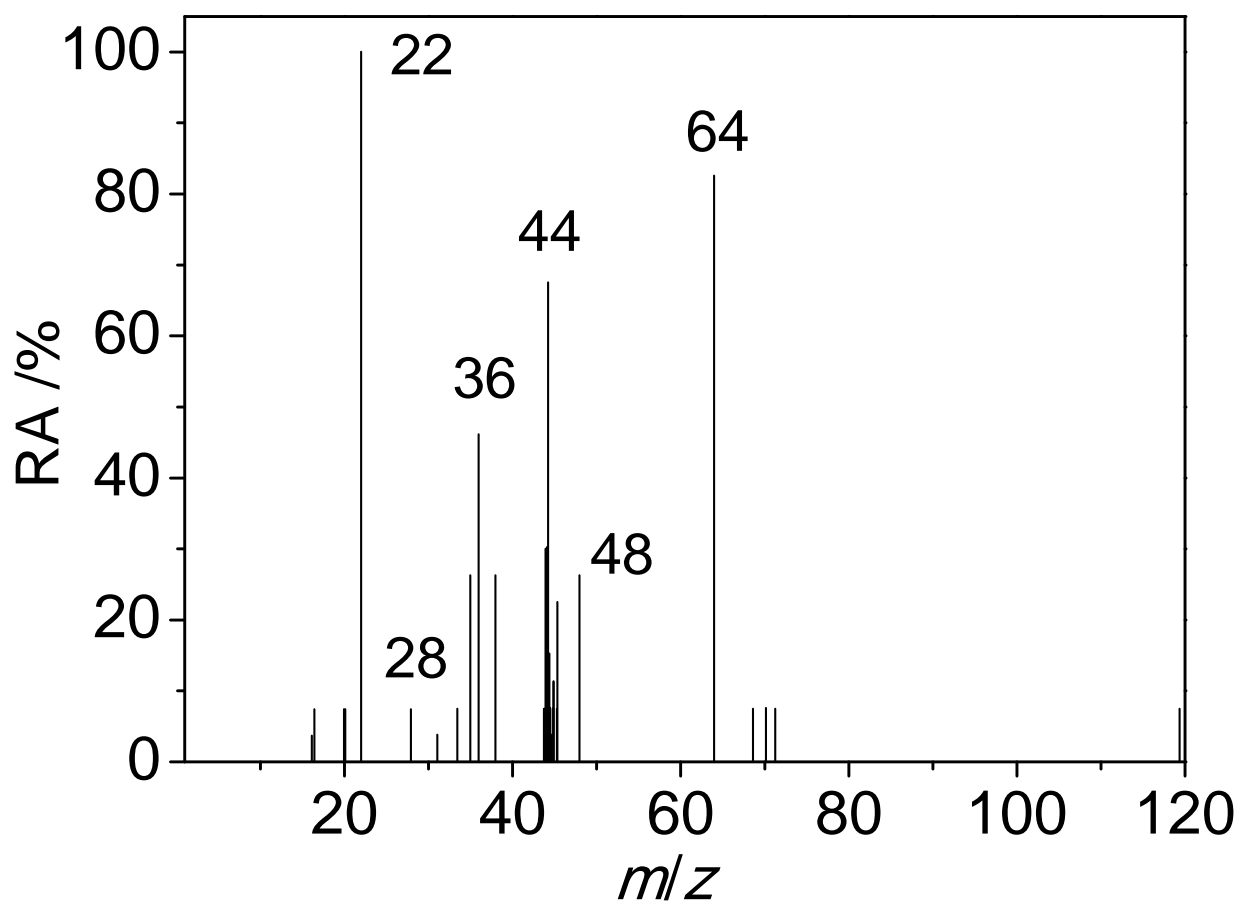

**Figure 2. XPS-(K<sub>2p</sub>) and XPS-(Fe<sub>2p</sub>) spectra of PF (a), the physical mixture of PF and β-CD (b), and PF-β-CD (c).**

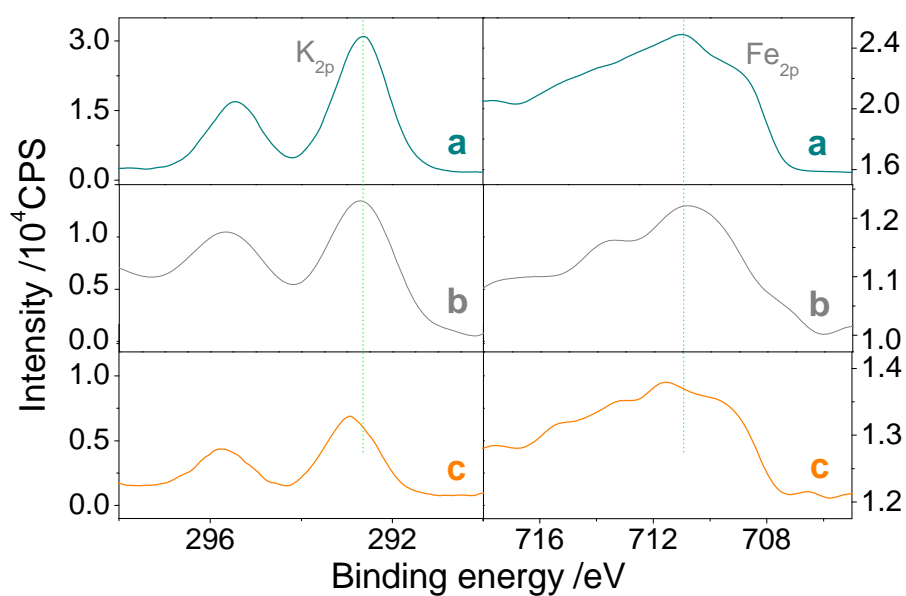

Supplement: c2dt11794k.pdf [file c2dt11794k.pdf]
